# Supplementary material
Source: Research Square preprint supplement (doi:10.21203/rs.3.rs-8561265/v1)
Supplement: Supplementary file 1 [file abeae089e8b61d1e1f4c1e88.xlsx]

## Sheet: Sheet1
Province	City	County	Cultivated Land (hm²)	Forest Land (hm²)	Grassland (hm²)	Construction Land (hm²)	Unused Land (hm²)	Permanent Population	Pigs (heads)	Cattle (heads)	Sheep (heads)	Poultry (birds)	Cultivated Land TN Pollution Load (t/a)	Cultivated Land TP Pollution Load (t/a)	Forest Land TN Pollution Load (t/a)	Forest Land TP Pollution Load (t/a)	Grassland TN Pollution Load (t/a)	Grassland TP Pollution Load (t/a)	Construction Land TN Pollution Load (t/a)	Construction Land TP Pollution Load (t/a)	Unused Land TN Pollution Load (t/a)	Unused Land TP Pollution Load (t/a)	Rural Domestic TN Pollution Load (t/a)	Rural Domestic TP Pollution Load (t/a)	Pig TN Pollution Load (t/a)	Pig TP Pollution Load (t/a)	Cattle TN Pollution Load (t/a)	Cattle TP Pollution Load (t/a)	Sheep TN Pollution Load (t/a)	Sheep TP Pollution Load (t/a)	Poultry TN Pollution Load (t/a)	Poultry TP Pollution Load (t/a)	Total TN Pollution Load (t/a)	Total TP Pollution Load (t/a)
Henan Province	Kaifeng City	Jinming District	0.852759	0	0	0	0	10636	1500	400	800	11000	0.0236555	0.0016373	0	0	0	0	0	0	0	0	16.8049	1.70176	9.165	1.515	0.18	0.068	0.184	0.036	0.308	0.132	26.6655	3.4544
Henan Province	Kaifeng City	Kaifeng County	2741.05	0	0	245.674	0	69756	65000	14000	22000	86000	76.0367	5.26282	0	0	0	0	2.70241	0.0589618	0	0	110.214	11.161	397.15	65.65	6.3	2.38	5.06	0.99	2.408	1.032	599.872	86.5347
Henan Province	Kaifeng City	Tongxu County	106.121	0	0	0	0	163482	228000	80017	47700	760000	2.94379	0.203752	0	0	0	0	0	0	0	0	258.302	26.1571	1393.08	230.28	36.0076	13.6029	10.971	2.1465	21.28	9.12	1722.58	281.51
Henan Province	Kaifeng City	Weishi County	119868	5592.79	1533.33	29266.5	236.672	1003801	1632103	280010	661721	8071700	3325.13	230.146	13.3108	0.838919	15.3333	0.306666	321.932	7.02397	3.52641	0.118336	1586.01	160.608	9972.15	1648.42	126.004	47.6017	152.196	29.7774	226.008	96.8604	15741.6	2221.71
Henan Province	Luoyang City	Luanchuan County	0	30.2913	0	0	0	22231	7770	1300	12000	470000	0	0	0.0720932	0.00454369	0	0	0	0	0	0	35.125	3.55696	47.4747	7.8477	0.585	0.221	2.76	0.54	13.16	5.64	99.1768	17.8102
Henan Province	Luoyang City	Ruyang County	35726	74933.5	6263.38	12603.2	955.637	565819	114170	24240	48164	2207700	991.039	68.5939	178.342	11.24	62.6338	1.25268	138.635	3.02477	14.239	0.477819	893.994	90.531	697.579	115.312	10.908	4.1208	11.0777	2.16738	61.8156	26.4924	3060.26	323.212
Henan Province	Luoyang City	Song County	6782.99	72881.4	4219.41	969.769	0	226323	196560	102030	117350	1547950	188.16	13.0233	173.458	10.9322	42.1941	0.843882	10.6675	0.232744	0	0	357.59	36.2117	1200.98	198.526	45.9135	17.3451	26.9905	5.28075	43.3426	18.5754	2089.3	300.971
Henan Province	Luoyang City	Yanshi City	1.04079	17.5323	1.45746	0	0	56735	18000	2700	6500	1300000	0.0288716	0.00199832	0.0417269	0.00262985	0.0145746	0.000291491	0	0	0	0	89.6413	9.0776	109.98	18.18	1.215	0.459	1.495	0.2925	36.4	15.6	238.816	43.614
Henan Province	Luoyang City	Yichuan County	1366.49	5.98023	10.2039	2327.71	0	183644	212050	33000	16255	341600	37.9063	2.62365	0.014233	0.000897035	0.102039	0.00204079	25.6048	0.558651	0	0	290.158	29.383	1295.63	214.171	14.85	5.61	3.73865	0.731475	9.5648	4.0992	1677.56	257.179
Henan Province	Luohe City	Linying County	63859	3384.58	1500.44	23999	236.625	699957	785200	18934	63640	4707700	1771.45	122.609	8.0553	0.507687	15.0044	0.300088	263.989	5.75976	3.52571	0.118313	1105.93	111.993	4797.57	793.052	8.5203	3.21878	14.6372	2.8638	131.816	56.4924	8120.5	1096.92
Henan Province	Luohe City	Wuyang County	58288.6	132.723	127.968	15897	0	600694	973000	33467	313500	3664000	1616.92	111.914	0.31588	0.0199084	1.27968	0.0255935	174.867	3.81528	0	0	949.097	96.111	5945.03	982.73	15.0602	5.68939	72.105	14.1075	102.592	43.968	8877.27	1258.38
Henan Province	Luohe City	Yancheng District	40439.8	3384.13	1500.44	19183.5	245.444	552172	1327600	18524	41250	11501700	1121.8	77.6444	8.05424	0.50762	15.0044	0.300088	211.018	4.60404	3.65711	0.122722	872.432	88.3475	8111.64	1340.88	8.3358	3.14908	9.4875	1.85625	322.048	138.02	10683.5	1655.43
Henan Province	Luohe City	Yuanhui District	14760.9	1.70444	7.03642	7380.67	0	376113	1001850	3200	3725	2092650	428.902	28.3409	0.00405656	0.000255666	0.0703642	0.00140728	81.1874	1.77136	0	0	594.259	60.1781	6121.3	1011.87	1.44	0.544	0.85675	0.167625	58.5942	25.1118	7286.62	1127.98
Henan Province	Luohe City	Zhaoling District	31595.1	0	0	11370.3	0	516718	1758300	85120	78160	4367685	1569.09	60.6627	0	0	0	0	125.074	2.72888	0	0	816.414	82.6749	10743.2	1775.88	38.304	14.4704	17.9768	3.5172	122.295	52.4122	13432.4	1992.35
Henan Province	Nanyang City	Fangcheng County	83645.1	40105.7	422.811	7589.36	19.7184	382060	652382	116956	684363	2336300	2320.31	160.599	95.4516	6.01586	4.22811	0.0845621	83.4829	1.82145	0.293805	0.00985922	603.655	61.1296	3986.05	658.906	52.6302	19.8825	157.403	30.7963	65.4164	28.0356	7368.93	967.28
Henan Province	Nanyang City	Nanzhao County	0.0527482	52.0446	0.193381	0	0	159515	136300	61500	132000	487000	0.00146323	0.000101276	0.123866	0.00780669	0.00193381	3.86761e-05	0	0	0	0	252.034	25.5224	832.793	137.663	27.675	10.455	30.36	5.94	13.636	5.844	1156.62	185.432
Henan Province	Nanyang City	Sheqi County	0	0.565799	0	0	0	13000	98000	16000	50700	684000	0	0	0.0013466	8.48698e-05	0	0	0	0	0	0	20.54	2.08	598.78	98.98	7.2	2.72	11.661	2.2815	19.152	8.208	657.334	114.27
Henan Province	Pingdingshan City	Baofeng County	68972	7392.42	1561.72	23095.3	1131.46	606705	571197	134929	181720	2696200	1913.28	132.426	17.594	1.10886	15.6172	0.312343	254.048	5.54287	16.8587	0.565729	958.594	97.0728	3490.01	576.909	60.718	22.9379	41.7956	8.1774	75.4936	32.3544	6844.02	877.408
Henan Province	Pingdingshan City	Jiaxian County	57454.9	2442.25	358.026	18275.8	1708.28	277820	437521	97701	179461	7889000	2074.48	110.313	5.81254	0.366337	3.58026	0.0716052	201.033	4.38618	25.4533	0.854138	438.956	44.4512	2673.25	441.896	43.9654	16.6092	41.276	8.07574	220.892	94.668	5728.7	721.692
Henan Province	Pingdingshan City	Lushan County	72280.9	142703	4833.37	13602.6	4443.48	897193	458000	127500	245850	1367300	2005.07	138.779	339.633	21.4055	48.3337	0.966673	149.629	3.26462	66.2078	2.22174	1417.56	143.551	2798.38	462.58	57.375	21.675	56.5455	11.0633	38.2844	16.4076	6977.03	821.915
Henan Province	Pingdingshan City	Ruzhou City	105544	18842.8	6761.1	21509.5	3716.08	989887	550250	198140	270520	8049500	3139.11	202.645	44.846	2.82643	67.611	1.35222	236.604	5.16227	55.3696	1.85804	1564.02	158.382	3362.03	555.753	89.163	33.6838	62.2196	12.1734	225.386	96.594	8846.35	1070.43
Henan Province	Pingdingshan City	Shilong District	1722.18	450.142	83.836	1389.09	0	61347	36000	40000	3600	130000	47.7734	3.30659	1.07134	0.0675212	0.83836	0.0167672	15.28	0.333381	0	0	96.9283	9.81552	219.96	36.36	18	6.8	0.828	0.162	3.64	1.56	404.319	58.4218
Henan Province	Pingdingshan City	Weidong District	3986.93	1544.75	93.3452	5665.09	47.9946	294201	16113	1005	1902	161956	412.284	7.65491	3.67652	0.231713	0.933452	0.018669	62.316	1.35962	0.715119	0.0239973	464.838	47.0722	98.4504	16.2741	0.45225	0.17085	0.43746	0.08559	4.53477	1.94347	1048.64	74.8351
Henan Province	Pingdingshan City	Wugang City	10.5525	24.5512	2.47956	0	0	45608	122000	49000	45500	590000	0.639491	0.0202609	0.0584318	0.00368267	0.0247956	0.000495912	0	0	0	0	72.0606	7.29728	745.42	123.22	22.05	8.33	10.465	2.0475	16.52	7.08	867.238	147.999
Henan Province	Pingdingshan City	Xinhua District	7342.85	502.277	314.609	6725.11	1552.31	728072	124350	16700	43420	655000	1267.31	14.0983	1.19542	0.0753415	3.14609	0.0629219	73.9762	1.61403	23.1294	0.776154	1150.35	116.492	759.779	125.594	7.515	2.839	9.9866	1.9539	18.34	7.86	3314.73	271.365
Henan Province	Pingdingshan City	Yexian County	111283	9941.71	387.017	27971.3	1937.34	369434	1276643	246971	606505	5100077	3086.98	213.663	23.6613	1.49126	3.87017	0.0774034	307.684	6.71311	28.8664	0.96867	583.706	59.1094	7800.29	1289.41	111.137	41.9851	139.496	27.2927	142.802	61.2009	12228.5	1701.91
Henan Province	Pingdingshan City	Zhanhe District	6470.3	68.1647	15.3182	4863.57	104.904	210735	137200	10620	201020	534000	179.486	12.423	0.162232	0.0102247	0.153182	0.00306364	53.4993	1.16726	1.56308	0.0524522	332.961	33.7176	838.292	138.572	4.779	1.8054	46.2346	9.0459	14.952	6.408	1472.08	203.205
Henan Province	Shangqiu City	Zhecheng County	0.442113	0	0	0	0	71200	90000	8000	12000	245000	0.0122642	0.000848857	0	0	0	0	0	0	0	0	112.496	11.392	549.9	90.9	3.6	1.36	2.76	0.54	6.86	2.94	675.628	107.133
Henan Province	Xinxiang City	Yuanyang County	0.162316	0	0	0	0	26262	60000	13000	500	130000	0.00450265	0.000311647	0	0	0	0	0	0	0	0	41.494	4.20192	366.6	60.6	5.85	2.21	0.115	0.0225	3.64	1.56	417.703	68.5947
Henan Province	Xuchang City	Weidu District	1404.32	0	0	7767.17	0	519984	44253	6895	24370	398056	78.2201	2.69629	0	0	0	0	85.4389	1.86412	0	0	727.685	73.6896	249.917	41.312	2.85975	1.08035	5.49148	1.07442	11.0084	4.71787	1160.62	126.435
Henan Province	Xuchang City	Xiangcheng County	73482.2	6020.52	1687.57	28931.9	236.625	832489	955520	116794	273326	4929386	2038.4	141.086	14.3288	0.903078	16.8757	0.337513	318.251	6.94367	3.52571	0.118313	1315.33	133.198	5838.23	965.075	52.5573	19.855	62.865	12.2997	138.023	59.1526	9798.38	1338.97
Henan Province	Xuchang City	Xuchang County	71533.8	0	302.565	27884	0	697380	465562	62416	2293091	5405419	1984.35	137.345	0	0	3.02565	0.060513	306.724	6.69216	0	0	1101.86	111.581	2844.58	470.218	28.0872	10.6107	527.411	103.189	151.352	64.865	6947.39	904.561
Henan Province	Xuchang City	Yanling County	72931.2	0	141.085	13564.5	0	589318	747982	109245	137379	4422000	2023.11	140.028	0	0	1.41085	0.028217	149.209	3.25547	0	0	931.122	94.2909	4570.17	755.462	49.1602	18.5717	31.5972	6.18206	123.816	53.064	7879.6	1070.88
Henan Province	Xuchang City	Yuzhou City	106512	8643.95	1697.84	29568.3	188.969	1233200	951700	98393	435792	16471000	2954.65	204.504	20.5726	1.29659	16.9784	0.339569	325.251	7.09639	2.81564	0.0944846	1948.46	197.312	5814.89	961.217	44.2769	16.7268	100.232	19.6106	461.188	197.652	11689.3	1605.85
Henan Province	Xuchang City	Changge City	45801.9	0	9.54111	24273.2	0	762784	845394	70323	148518	3787700	1270.54	87.9396	0	0	0.0954111	0.00190822	267.005	5.82556	0	0	1205.2	122.045	5165.36	853.848	31.6454	11.9549	34.1591	6.68331	106.056	45.4524	8080.06	1133.75
Henan Province	Zhengzhou City	Dengfeng City	69306.3	21680.7	1533.83	13649.7	0	702648	602600	178910	131340	5142600	2088.87	133.068	51.6001	3.25211	15.3383	0.306767	150.147	3.27594	0	0	1110.18	112.424	3681.89	608.626	80.5095	30.4147	30.2082	5.9103	143.993	61.7112	7352.73	958.989
Henan Province	Zhengzhou City	Erqi District	6876.23	347.532	49.3261	10555.1	0	607180	124160	89880	93740	219950	231.917	13.2024	0.827125	0.0521297	0.493261	0.00986522	116.107	2.53323	0	0	959.344	97.1488	758.618	125.402	40.446	15.2796	21.5602	4.2183	6.1586	2.6394	2135.47	260.485
Henan Province	Zhengzhou City	Gongyi City	15.1805	45.3851	2.67666	0	0	94707	100000	15000	14900	197000	0.421108	0.0291466	0.108017	0.00680777	0.0267666	0.000535333	0	0	0	0	149.637	15.1531	611	101	6.75	2.55	3.427	0.6705	5.516	2.364	776.886	121.774
Henan Province	Zhengzhou City	Guancheng Hui District	13273.9	10.7875	20.683	18601.9	103.152	544664	139857	18502	43070	632300	493.977	25.4859	0.0256742	0.00161812	0.20683	0.0041366	204.62	4.46445	1.53697	0.0515761	860.569	87.1462	854.526	141.256	8.3259	3.14534	9.9061	1.93815	17.7044	7.5876	2451.4	271.081
Henan Province	Zhengzhou City	Huiji District	9857.03	0	199.738	10607	0	237056	49040	12744	17276	1611000	798.615	18.9255	0	0	1.99738	0.0399476	116.677	2.54567	0	0	374.548	37.929	299.634	49.5304	5.7348	2.16648	3.97348	0.77742	45.108	19.332	1646.29	131.246
Henan Province	Zhengzhou City	Jinshui District	6365.07	8.20928	49.3137	19528.7	24.5003	1484363	138410	47514	43380	208104	335.695	12.2209	0.0195381	0.00123139	0.493137	0.00986273	214.816	4.68689	0.365055	0.0122502	2345.29	237.498	845.685	139.794	21.3813	8.07738	9.9774	1.9521	5.82691	2.49725	3779.55	406.75
Henan Province	Zhengzhou City	Xinmi City	68818.2	10172.3	2435.15	28790.4	236.625	852710	328580	58776	103061	4647200	1909.02	132.131	24.2102	1.52585	24.3515	0.48703	316.694	6.90968	3.52571	0.118313	1347.28	136.434	2007.62	331.866	26.4492	9.99192	23.704	4.63774	130.122	55.7664	5812.98	679.867
Henan Province	Zhengzhou City	Xinzheng City	76330.2	3321.84	182.527	39541.1	917.787	695599	640075	181961	314987	5237806	2117.4	146.554	7.90599	0.498277	1.82527	0.0365054	434.952	9.48987	13.675	0.458894	1099.05	111.296	3910.86	646.476	81.8825	30.9334	72.447	14.1744	146.659	62.8537	7886.65	1022.77
Henan Province	Zhengzhou City	Xingyang City	0.0801028	0	0	1.3758	0	133497	57300	2830	19640	1561000	0.00222205	0.000153797	0	0	0	0	0.0151338	0.000330192	0	0	210.925	21.3595	350.103	57.873	1.2735	0.4811	4.5172	0.8838	43.708	18.732	610.544	99.3299
Henan Province	Zhengzhou City	Zhongmou County	78710.5	0.554375	237.698	26534.7	42.9744	1015089	1142524	134554	469460	5237400	3413.55	151.124	0.00131941	8.31563e-05	2.37698	0.0475396	291.881	6.36832	0.640318	0.0214872	1603.84	162.414	6980.82	1153.95	60.5493	22.8742	107.976	21.1257	146.647	62.8488	12608.3	1580.77
Henan Province	Zhengzhou City	Zhongyuan District	3955.03	18.2893	60.8126	14703.3	0	1012889	79500	11810	29508	256450	109.712	7.59365	0.0435285	0.00274339	0.608126	0.0121625	161.736	3.52878	0	0	1600.36	162.062	485.745	80.295	5.3145	2.0077	6.78684	1.32786	7.1806	3.0774	2377.49	259.908
Henan Province	Zhoukou City	Chuanhui District	18997.3	0	0	14173.2	0	748230	638340	14484	71218	814450	650.007	36.4749	0	0	0	0	155.905	3.40157	0	0	1182.2	119.717	3900.26	644.723	6.5178	2.46228	16.3801	3.20481	22.8046	9.7734	5934.08	819.757
Henan Province	Zhoukou City	Dancheng County	110889	0	67.9341	33916.9	0	1000650	371600	34880	168460	3839000	3076.06	212.907	0	0	0.679341	0.0135868	373.086	8.14007	0	0	1581.03	160.104	2270.48	375.316	15.696	5.9296	38.7458	7.5807	107.492	46.068	7463.26	816.059
Henan Province	Zhoukou City	Fugou County	105685	3383.98	1501.48	22983.8	236.625	852228	1031900	71355	184960	41715700	2931.7	202.915	8.05388	0.507597	15.0148	0.300296	252.822	5.51612	3.52571	0.118313	1346.52	136.356	6304.91	1042.22	32.1097	12.1303	42.5408	8.3232	1168.04	500.588	12105.2	1908.97
Henan Province	Zhoukou City	Huaiyang County	97347.7	0	0	34622.5	296.356	1405754	537450	57150	343000	5072000	2700.42	186.908	0	0	0	0	380.848	8.30941	4.41571	0.148178	2221.09	224.921	3283.82	542.824	25.7175	9.7155	78.89	15.435	142.016	60.864	8837.22	1049.12
Henan Province	Zhoukou City	Luyi County	22210.1	20384.3	359.997	7209.93	0	472503	349000	26400	104400	1185000	616.109	42.6434	48.5145	3.05764	3.59997	0.0719994	79.3093	1.73038	0	0	746.555	75.6005	2132.39	352.49	11.88	4.488	24.012	4.698	33.18	14.22	3695.55	499
Henan Province	Zhoukou City	Shangshui County	113532	181.429	99.6453	33758.2	120.15	1010269	2571034	315477	933512	7353486	5917.39	217.981	0.4318	0.0272143	0.996453	0.0199291	371.34	8.10196	1.79023	0.0600748	1596.23	161.643	15709	2596.74	141.965	53.6311	214.708	42.008	205.898	88.2418	24159.8	3168.46
Henan Province	Zhoukou City	Shenqiu County	82961.5	0	0	31936.8	0	1254024	566559	56130	248980	4096120	3473.39	159.286	0	0	0	0	351.305	7.66483	0	0	1981.36	200.644	3461.68	572.225	25.2585	9.5421	57.2654	11.2041	114.691	49.1534	9464.95	1009.72
Henan Province	Zhoukou City	Taikang County	56813.9	0	0	10812.3	0	801059	570736	95260	297810	2134630	1576.02	109.083	0	0	0	0	118.935	2.59494	0	0	1265.67	128.169	3487.2	576.443	42.867	16.1942	68.4963	13.4015	59.7696	25.6156	6618.96	871.502
Henan Province	Zhoukou City	Xihua County	97398.5	0	0	21474.9	0	970411	947060	49646	219314	6193400	3204.47	187.005	0	0	0	0	236.224	5.15398	0	0	1533.25	155.266	5786.54	956.531	22.3407	8.43982	50.4422	9.86913	173.415	74.3208	11006.7	1396.59
Henan Province	Zhoukou City	Xiangcheng City	81548.8	0	0	23480.8	0	1170982	431986	44054	115115	7200200	3365.39	156.574	0	0	0	0	258.288	5.63538	0	0	1850.15	187.357	2639.43	436.306	19.8243	7.48918	26.4764	5.18018	201.606	86.4024	8361.18	884.944
Henan Province	Zhumadian City	Biyang County	7.32544	51.4232	0.6255	0	0	86273	216000	117000	189000	258000	0.203208	0.0140648	0.122387	0.00771347	0.006255	0.0001251	0	0	0	0	136.311	13.8037	1319.76	218.16	52.65	19.89	43.47	8.505	7.224	3.096	1559.75	263.477
Henan Province	Zhumadian City	Pingyu County	50.8424	0	0	4.88063	0	229006	166834	20980	21900	979070	1.41037	0.0976174	0	0	0	0	0.0536869	0.00117135	0	0	361.829	36.641	1019.36	168.502	9.441	3.5666	5.037	0.9855	27.414	11.7488	1424.54	221.543
Henan Province	Zhumadian City	Shangcai County	57495.9	0	0	11266.9	0	443264	1302300	132350	848200	7933400	1594.93	110.392	0	0	0	0	123.935	2.70405	0	0	700.357	70.9222	7957.05	1315.32	59.5575	22.4995	195.086	38.169	222.135	95.2008	10853.1	1655.21
Henan Province	Zhumadian City	Xiping County	10806.8	0	0	2586.11	0	207615	957880	122157	32900	11578800	299.781	20.7491	0	0	0	0	28.4472	0.620667	0	0	328.032	33.2184	5852.65	967.459	54.9706	20.7667	7.567	1.4805	324.206	138.946	6895.65	1183.24
